# Supplementary material
Source: PubMed Central journal article supplement (PMC2824537)
Supplement: NIHMS175978-supplement-Supporting_Information.pdf [file NIHMS175978-supplement-Supporting_Information.pdf]

**Supporting Information**

DOI: 10.1002/smll.200800257

**Synthesis of Ultrasmall Ferromagnetic fct FePt-Graphite Core-Shell Nanocrystals\*\***

*Won Seok Seo\*, Se Mi Kim, Young-Min Kim, Xiaoming Sun, and Hongjie Dai\**

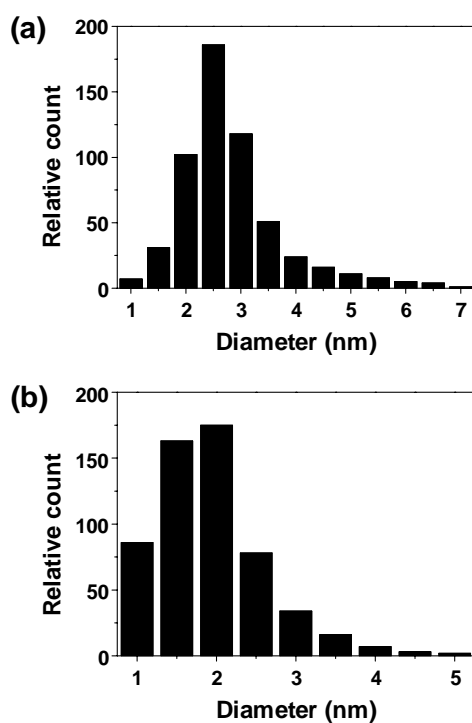

**Figure S1.** Particle size distribution histograms of (a)  $2.8 \pm 0.9$  nm and (b)  $1.9 \pm 0.7$  nm FePt/GC nanocrystals.

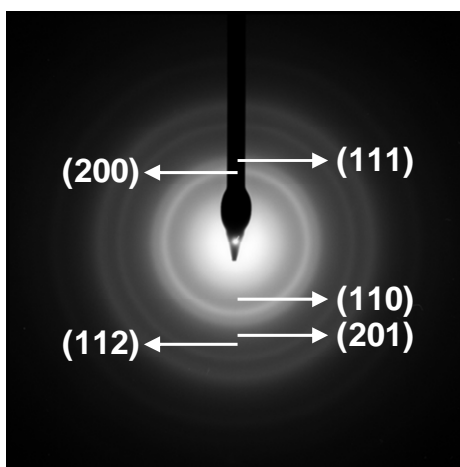

**Figure S2.** An ED pattern of  $\sim 1.9$  nm FePt/GC nanocrystals. It shows very weak characteristics corresponding to fct FePt structures such as the (110), (201), and (112) features that are clearly seen from an ED pattern of  $\sim 2.8$  nm FePt/GC nanocrystals.

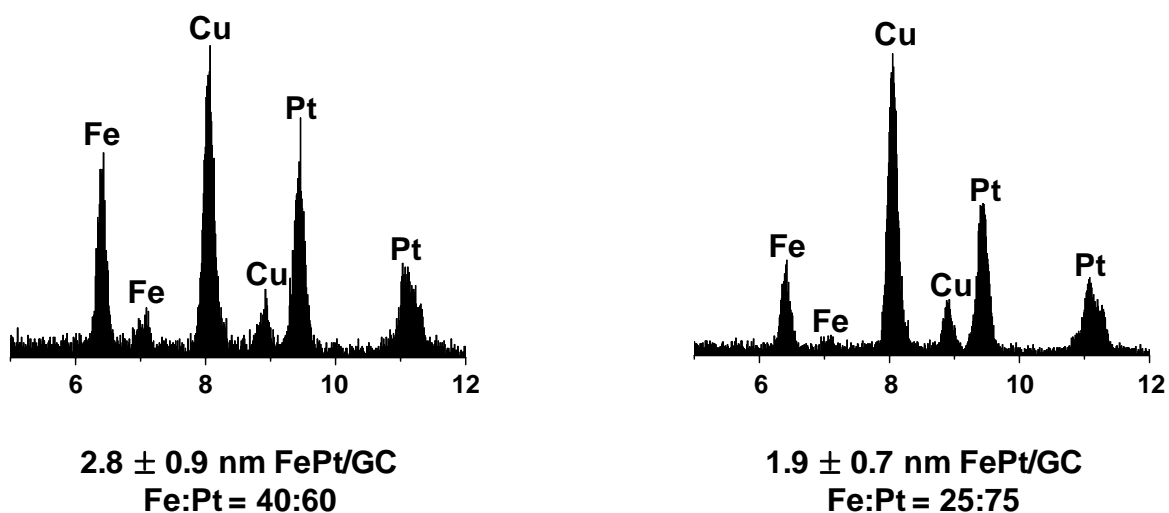

**Figure S3.** EDX spectra of FePt/GC nanocrystals. They were used to determine Fe:Pt ratios. Both FePt/GC nanocrystal samples have Pt richness. Copper is from the TEM grids.

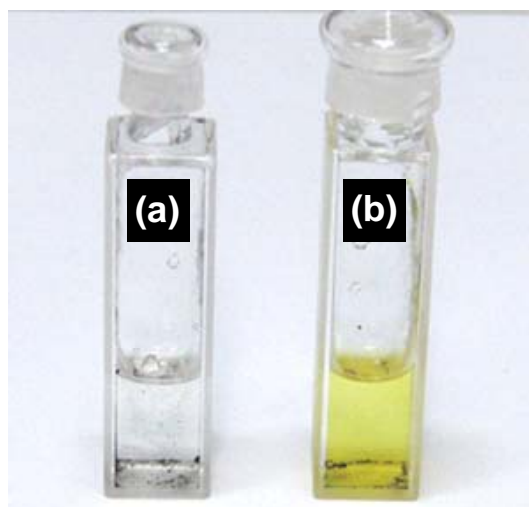

**Figure S4.** Photographs of  $\sim 2.8$  nm (a) FePt/GC nanocrystals and (b) FePt nanocrystals having partially broken carbon shells in 35% HCl solutions. FePt/GC nanocrystals exhibited stability against HCl etching over a monitoring period of a week. However, FePt nanocrystals having partially broken carbon shells turned the color to yellow in the HCl solution right after the addition due to the Fe etching.
